# Supplementary material for: Highly sensitive and selective determination of uranium in natural waters through a novel solidified floating organic drop microextraction method coupled with spectrophotometric determination
Source: Royal Society of Chemistry journal article supplement (doi:10.1039/c4ay00981a), 2014-01-01
Supplement: c4ay00981a1.pdf [file c4ay00981a1.pdf]

### Supplementary Data

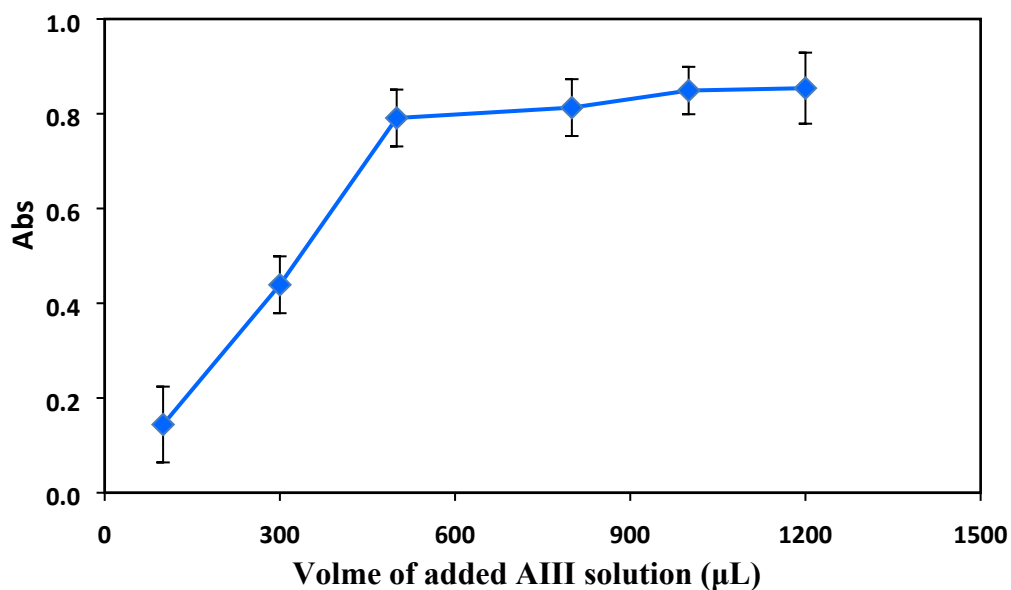

**SD-Fig. 1** The effect of AIII concentration on  $\text{UO}_2^{2+}$ -AIII complex formation.

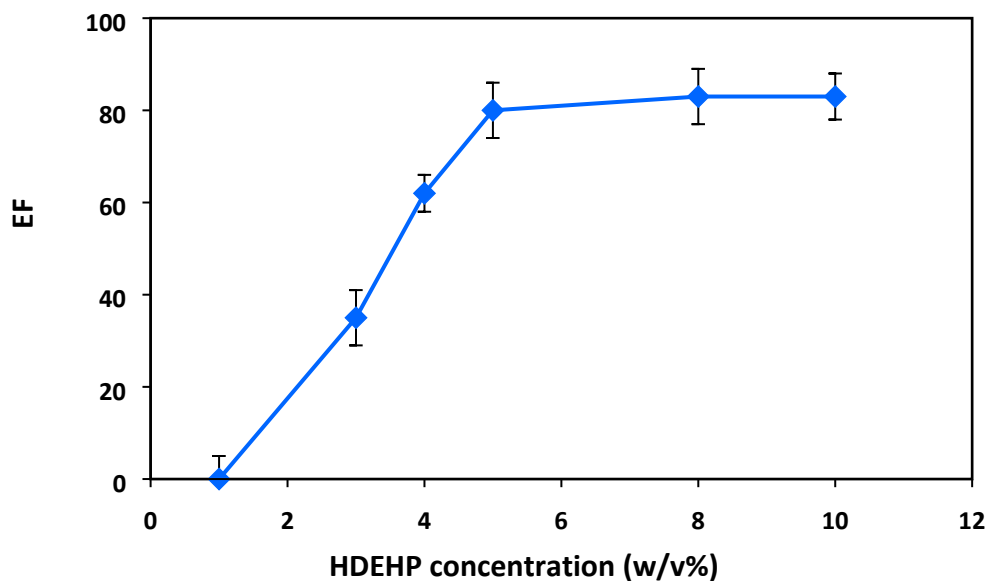

**SD-Fig. 2** Influence of HDEHP concentration on EF in the proposed SFODME method of uranium (sample solution: 15 mL 0.1 M  $\text{HClO}_4$  containing  $50 \text{ ng mL}^{-1}$  of uranium, extractant: 50  $\mu\text{L}$  of different concentration of HDEHP solution in 1-dodecanol, stirring rate: 700 rpm, extraction time and temperature: 30 min and 30 °C, cooling time in ice-bath: 5 min).

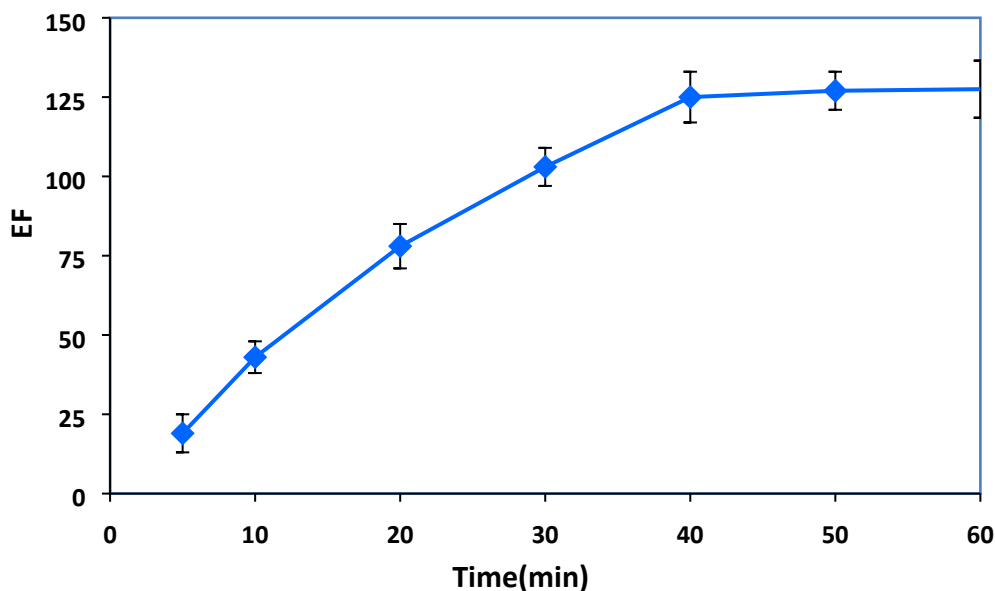

**SD-Fig. 3** The extraction time effect on EF of uranium extracted by the proposed SFODME method (sample solution: 15 mL 0.1 M HClO<sub>4</sub> containing 50 ng mL<sup>-1</sup> of uranium, extractant: 50 μL of 5% w/v HDEHP solution in 1-dodecanol, stirring rate: 900 rpm, extraction temperature: 30 °C, cooling time in ice-bath: 5 min).

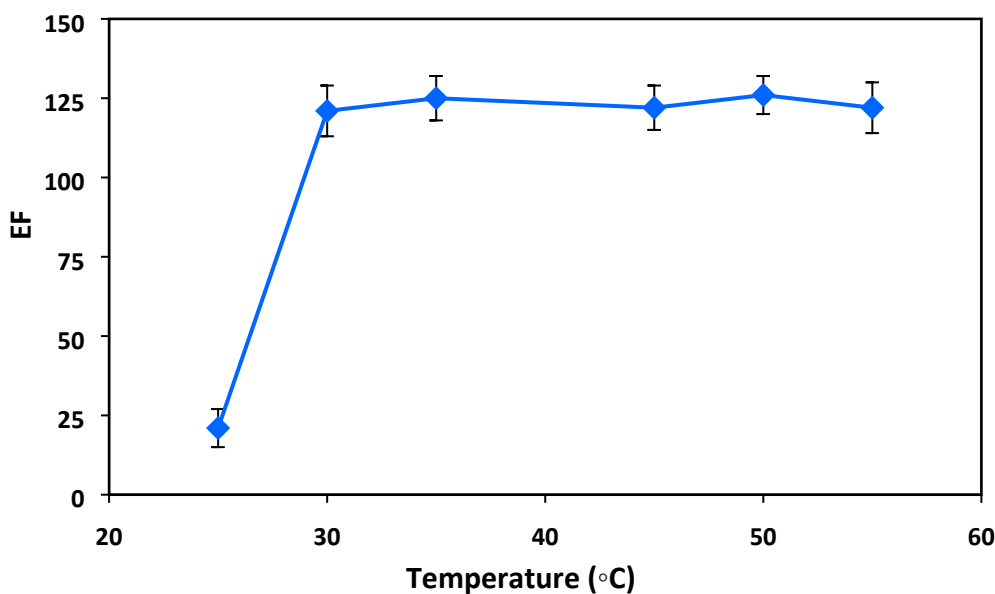

**SD-Fig. 4** The influence of extraction temperature on EF of uranium, extracted using the proposed SFODME method (sample solution: 15 mL 0.1 M HClO<sub>4</sub> containing 50 ng mL<sup>-1</sup> of uranium, extractant: 50 μL of 5% w/v HDEHP solution in 1-dodecanol, stirring rate: 900 rpm, extraction time: 40 min, cooling time in ice-bath: 5 min).
